# Supplementary material for: Optimizing Nanomaterial Selection for Wastewater Treatment: A Multi-Criteria Analysis of Adsorption Efficiency for Methylene Blue and Heavy Metals
Source: Research Square preprint supplement (doi:10.21203/rs.3.rs-6905036/v1), 2025-06-30
Supplement: Supplementary file 1 [file 52f46d8240d6854c0b8616da.docx]

**Supplementary File for**

**Optimizing Nanomaterial Selection for Wastewater Treatment: A Multi-Criteria Analysis of Adsorption Efficiency for Methylene Blue and Heavy Metals**

Amine Zribi1, Levente Csóka1

1ELTE Eötvös Loránd University, Faculty of Informatics, 1053 Budapest, Hungary

*Corresponding authors: Amine Zribi: zribiamine10@hotmail.fr; Levente Csóka: csl@inf.elte.hu

1. **Application of Entropy – SAW method on Methylene Blue dye removal data**
   1. **Entropy method applied to Methylene Blue dye removal data**
      1. **Entropy method applied considering all temperatures – 1st approach**

All temperatures T1 = 25°C, T2 = 35°C, and T3 = 45°C are subcriteria for C4 and C5. In the following calculations, C4Tk and C5Tk, where k ϵ {1,2,3}, are considered the criteria for the MCDM approach.

All steps performed are detailed in Section 4 of the paper:

|  | C1 | C2 | C3 | C4T1 | C4T2 | C4T3 | C5T1 | C5T2 | C5T3 |
| --- | --- | --- | --- | --- | --- | --- | --- | --- | --- |
| A1 | 0.007706 | 0.044790 | 0.133333 | 0.033333 | 0.033333 | 0.086957 | 0.033333 | 0.033333 | 0.066667 |
| A2 | 0.007400 | 0.046039 | 0.033333 | 0.133333 | 0.100000 | 0.043478 | 0.133333 | 0.066667 | 0.033333 |
| A3 | 0.007878 | 0.044712 | 0.066667 | 0.066667 | 0.066667 | 0.130435 | 0.066667 | 0.100000 | 0.100000 |
| A4 | 0.008068 | 0.040967 | 0.100000 | 0.100000 | 0.133333 | 0.130435 | 0.100000 | 0.133333 | 0.133333 |

**Table** **1.** The feature weight Pij of the collected data is shown in Table 7. At all temperatures, C1 to C5 are the crystallite size, energy band gap, contact time, % of MB dye removed, and qe, respectively, and A1 to A4 are samples S1 to S4 [14].

|  | C1 | C2 | C3 | C4T1 | C4T2 | C4T3 | C5T1 | C5T2 | C5T3 |
| --- | --- | --- | --- | --- | --- | --- | --- | --- | --- |
| ej | 0.108816 | 0.397217 | 0.571900 | 0.571900 | 0.571900 | 0.634832 | 0.571900 | 0.571900 | 0.571900 |
| gj | 0.891184 | 0.602783 | 0.428100 | 0.428100 | 0.428100 | 0.365168 | 0.428100 | 0.428100 | 0.428100 |
| wj | 0.201273 | 0.136138 | 0.096686 | 0.096686 | 0.096686 | 0.082473 | 0.096686 | 0.096686 | 0.096686 |

**Table 2.** The output entropy ej, variation coefficient gj, and objective weight wj for each criterion at all temperatures.

To verify the weight calculation, the sum of all weights should be equal to 1:

|  | ( 1 ) |
| --- | --- |

**Figure 1.** Pie chart of the percentages of objective weights for all criteria of Ca(OH)2 alternatives for MB dye removal.

- - 1. **Entropy method applied considering temperature T1 – 2nd approach**

For the next calculation, only temperature T1 was considered for criteria C4 and C5 (considering C4T1 and C5T1).

All steps performed are detailed in Section 4 of the paper:

|  | C1 | C2 | C3 | C4T1 | C5T1 |
| --- | --- | --- | --- | --- | --- |
| A1 | 0.007706 | 0.04479 | 0.133333 | 0.033333 | 0.033333 |
| A2 | 0.0074 | 0.046039 | 0.033333 | 0.133333 | 0.133333 |
| A3 | 0.007878 | 0.044712 | 0.066667 | 0.066667 | 0.066667 |
| A4 | 0.008068 | 0.040967 | 0.1 | 0.1 | 0.1 |

**Table 3.** The feature weight Pij of the collected data is shown in Table 7. At temperature T1, C1 to C5 are the crystallite size, energy band gap, contact time, % of MB dye removed, and qe, respectively. A1 to A4 are samples S1 to S4 [14].

|  | C1 | C2 | C3 | C4T1 | C5T1 |
| --- | --- | --- | --- | --- | --- |
| ej | 0.108816 | 0.397217 | 0.571900 | 0.571900 | 0.571900 |
| gj | 0.891184 | 0.602783 | 0.428100 | 0.428100 | 0.428100 |
| wj | 0.320770 | 0.216964 | 0.154089 | 0.154089 | 0.154089 |

**Table 4.** Output entropy ej, variation coefficient gj, and objective weight wj for each criterion at Temperature T1.

To verify the weight calculation, the sum of all weights should be equal to 1:

|  | ( 2 ) |
| --- | --- |

- - 1. **Entropy method applied considering temperature T2 – 2nd approach**

For the next calculation, only temperature T2 is considered for criteria C4 and C5 (considering C4T2 and C5T2).

All steps performed are detailed in Section 4 of the paper:

|  | C1 | C2 | C3 | C4T2 | C5T2 |
| --- | --- | --- | --- | --- | --- |
| A1 | 0.007706 | 0.044790 | 0.133333 | 0.033333 | 0.033333 |
| A2 | 0.007400 | 0.046039 | 0.033333 | 0.100000 | 0.066667 |
| A3 | 0.007878 | 0.044712 | 0.066667 | 0.066667 | 0.100000 |
| A4 | 0.008068 | 0.040967 | 0.100000 | 0.133333 | 0.133333 |

**Table 5.** Feature weight Pij of the collected data, as shown in Table 7., only at temperature T2, C1 to C5 are crystallite size, energy band gap, contact time, % of MB dye removed, and qe, respectively, A1 to A4 are samples S1 to S4 [14].

|  | C1 | C2 | C3 | C4T2 | C5T2 |
| --- | --- | --- | --- | --- | --- |
| ej | 0.108816 | 0.397217 | 0.5719 | 0.5719 | 0.5719 |
| gj | 0.891184 | 0.602783 | 0.4281 | 0.4281 | 0.4281 |
| wj | 0.32077 | 0.216964 | 0.154089 | 0.154089 | 0.154089 |

**Table 6.** Output entropy ej, variation coefficient gj, and objective weight wj for each criterion at Temperature T2.

To verify the weight calculation, the sum of all weights should be equal to 1:

|  | ( 3 ) |
| --- | --- |

- - 1. **Entropy method applied considering temperature T3 – 2nd approach**

For the next calculation, only the temperature T3 was considered for criteria C4 and C5 (considering C4T3 and C5T3).

All steps performed are detailed in Section 4 of the paper:

|  | C1 | C2 | C3 | C4T3 | C5T3 |
| --- | --- | --- | --- | --- | --- |
| A1 | 0.007706 | 0.044790 | 0.133333 | 0.086957 | 0.066667 |
| A2 | 0.007400 | 0.046039 | 0.033333 | 0.043478 | 0.033333 |
| A3 | 0.007878 | 0.044712 | 0.066667 | 0.130435 | 0.100000 |
| A4 | 0.008068 | 0.040967 | 0.100000 | 0.130435 | 0.133333 |

**Table 7.** Feature weight Pij of the collected data, as shown in Table 7., only at temperature T3, C1 to C5 are the crystallite size (nm), energy band gap (eV), contact time (scale), % of MB dye removed (scale), and qe (scale), respectively, A1 to A4 are samples S1 to S4 [14].

|  | C1 | C2 | C3 | C4T3 | C5T3 |
| --- | --- | --- | --- | --- | --- |
| ej | 0.108816 | 0.397217 | 0.5719 | 0.634832 | 0.5719 |
| gj | 0.891184 | 0.602783 | 0.4281 | 0.365168 | 0.4281 |
| wj | 0.328204 | 0.221992 | 0.15766 | 0.134484 | 0.15766 |

**Table 8.** Output entropy ej, variation coefficient gj, and objective weight wj for each criterion at Temperature T3.

To verify the weight calculation, the sum of all weights should be equal to 1:

|  | ( 4 ) |
| --- | --- |

- 1. **SAW method applied to Methylene Blue dye removal data**
     1. **SAW method applied considering all temperatures – 1st approach**

All steps performed are detailed in Section 4 of the paper:

|  | C1 | C2 | C3 | C4T1 | C4T2 | C4T3 | C5T1 | C5T2 | C5T3 |
| --- | --- | --- | --- | --- | --- | --- | --- | --- | --- |
| A1 | 0.960239 | 0.972881 | 0.250000 | 0.250000 | 0.250000 | 0.666667 | 0.250000 | 0.250000 | 0.500000 |
| A2 | 1.000000 | 1.000000 | 1.000000 | 1.000000 | 0.750000 | 0.333333 | 1.000000 | 0.500000 | 0.250000 |
| A3 | 0.939332 | 0.971186 | 0.500000 | 0.500000 | 0.500000 | 1.000000 | 0.500000 | 0.750000 | 0.750000 |
| A4 | 0.917155 | 0.889831 | 0.333333 | 0.750000 | 1.000000 | 1.000000 | 0.750000 | 1.000000 | 1.000000 |
| aj+/aj- | 30.6658 | 5.9 | 1 | 4 | 4 | 3 | 4 | 4 | 4 |

**Table 9.** Normalised decision matrix for data collected in Table 7:, maximum aj+ (for beneficial criterion) and minimum aj- (for non-beneficial criterion) values of aij for the jth criterion, at all temperatures, C1 to C5 are crystallite size, energy band gap, contact time, % of MB dye removed, and qe, respectively, A1 to A4 are samples S1 to S4 [14] respectively.

| Ai | Samples |
| --- | --- |
| 0.549898933 | **S1** |
| 0.799989155 | **S2** |
| 0.742151563 | **S3** |
| 0.855526891 | **S4** |

**Table 10.** Score index Ai of the performance of different Ca(OH)2 samples (S1 to S4) [14] in Methylene Blue dye removal, at all temperatures (T1, T2, and T3).

- - 1. **SAW method applied considering temperature T1 – 2nd approach**

All steps performed are detailed in Section 4 of the paper:

|  | C1 | C2 | C3 | C4T1 | C5T1 |
| --- | --- | --- | --- | --- | --- |
| A1 | 0.960239 | 0.972881 | 0.250000 | 0.250000 | 0.250000 |
| A2 | 1.000000 | 1.000000 | 1.000000 | 1.000000 | 1.000000 |
| A3 | 0.939332 | 0.971186 | 0.500000 | 0.500000 | 0.500000 |
| A4 | 0.917155 | 0.889831 | 0.333333 | 0.750000 | 0.750000 |
| aj+/aj- | 30.6658 | 5.9 | 1 | 4 | 4 |

**Table 11.** The normalised decision matrix for the data collected in Table 7, at temperature T1, maximum aj+ (for beneficial criterion) and minimum aj- (for non-beneficial criterion) vaNormalised for the jth criterion, C1 to C5 are crystalli: Atze, energy band gthe ap, contact time, % of MB dye removed, and qe, respectively, A1 to A4 are samples S1–S4 [14].

| Ai | Samples |
| --- | --- |
| 0.634662 | **S1** |
| 1.000000 | **S2** |
| 0.743155 | **S3** |
| 0.769753 | **S4** |

**Table 12.** Score index Ai of the performance of the different Ca(OH)2 samples (S1–S4) [14] in Methylene Blue dye removal, at temperature T1.

- - 1. **SAW method applied considering temperature T2 – 2nd approach**

All steps performed are detailed in Section 4 of the paper:

|  | C1 | C2 | C3 | C4T2 | C5T2 |
| --- | --- | --- | --- | --- | --- |
| A1 | 0.960239 | 0.972881 | 0.250000 | 0.250000 | 0.250000 |
| A2 | 1.000000 | 1.000000 | 1.000000 | 0.750000 | 0.500000 |
| A3 | 0.939332 | 0.971186 | 0.500000 | 0.500000 | 0.750000 |
| A4 | 0.917155 | 0.889831 | 0.333333 | 1.000000 | 1.000000 |
| aj+/aj- | 30.6658 | 5.9 | 1 | 4 | 4 |

**Table 13.** Normalised decision matrix for data collected in Table 7:, at temperature T2, the maximum aj+ (for the beneficial criterion) and minimum aj- (for the non-beneficial criterion) values of aij for the jth criterion. C1 to C5 are the crystallite size, energy band gap, contact time, % of MB dye removed, and qe, respectively. A1 to A4 are samples S1–S4 [14].

| Ai | Samples |
| --- | --- |
| 0.634662 | **S1** |
| 0.884433 | **S2** |
| 0.781677 | **S3** |
| 0.846797 | **S4** |

**Table 14.** Score index Ai of the performance of different Ca(OH)2 samples (S1 to S4) [14] in Methylene Blue dye removal, at temperature T2.

- - 1. **SAW method applied considering temperature T3 – 2nd approach**

All steps performed are detailed in Section 4 of the paper:

|  | C1 | C2 | C3 | C4T3 | C5T3 |
| --- | --- | --- | --- | --- | --- |
| A1 | 0.960239 | 0.972881 | 0.250000 | 0.500000 | 0.500000 |
| A2 | 1.000000 | 1.000000 | 1.000000 | 0.250000 | 0.250000 |
| A3 | 0.939332 | 0.971186 | 0.500000 | 0.750000 | 0.750000 |
| A4 | 0.917155 | 0.889831 | 0.333333 | 0.750000 | 1.000000 |
| aj+/aj- | 30.6658 | 5.9 | 1 | 4 | 4 |

**Table 15.** Normalized decision matrix for data collected in Table 7., at temperature T3, maximum aj+ (for beneficial criterion) and minimum aj- (for non-beneficial criterion) value of aij for the jth criterion, C1 to C5 are crystallite size, energy band gap, contact time, % of MB dye removed, and qe, respectively, A1 to A4 are samples S1–S4 [14].

| Ai | Samples |
| --- | --- |
| 0.716613 | **S1** |
| 0.780892 | **S2** |
| 0.821826 | **S3** |
| 0.809625 | **S4** |

**Table 16.** Score index Ai of the performance of different Ca(OH)2 samples (S1–S4) [14] in Methylene Blue dye removal, at temperature T3.

1. **Application of the Entropy – TOPSIS method on Heavy Earth Metals removal data**
   1. **Entropy method applied to heavy metals removal data**
      1. **Entropy method applied to adsorption data of Pb(II) ions in aqueous media using different types of graphene**

All steps performed are detailed in Section 4 of the paper:

|  | C1 | C2 | C3 | C4 |
| --- | --- | --- | --- | --- |
| A1 | 0.000421 | 0.013723 | 0.005927 | 0.000019 |
| A2 | 0.001605 | 0.023329 | 0.009482 | 0.000196 |
| A3 | 0.001605 | 0.024015 | 0.009482 | 0.000370 |
| A4 | 0.001605 | 0.023329 | 0.009482 | 0.000281 |
| A5 | 0.000210 | 0.020585 | 0.000395 | 0.000061 |
| A6 | 0.001605 | 0.024015 | 0.009482 | 0.000525 |
| A7 | 0.000042 | 0.024015 | 0.000395 | 0.000011 |

**Table** **17.** The feature weight Pij of the collected data is shown in Table 8., C1 - C4 are concentration (mg.L-1), pH, contact time (h), and adsorption capacity (mg.g-1), respectively, A1 to A7 are graphene heat treated at 973 K, GO, GO, EDTA modified GO, SiO2/graphene, Poly(N-vinylcarbazole)–GO, and RGO–Fe(0)/Fe3O4, respectively.

|  | C1 | C2 | C3 | C4 |
| --- | --- | --- | --- | --- |
| ej | 0.024039 | 0.299499 | 0.109601 | 0.006054 |
| gj | 0.975961 | 0.700501 | 0.890399 | 0.993946 |
| wj | 0.274084 | 0.196725 | 0.250055 | 0.279135 |

**Table 18.** Output entropy ej, variation coefficient gj, and objective weight wj for each criterion.

To verify the weight calculation, the sum of all weights should be equal to 1:

|  | ( 5 ) |
| --- | --- |

**Figure 2.** Pie chart of the percentages of objective weights for all criteria of graphene-based alternatives for Pb(II) ion removal from aqueous media.

- - 1. **Entropy method applied to adsorption data of Cu(II) ions in aqueous media using different composite biosorbents**

All steps performed are detailed in Section 4 of the paper:

|  | C1 | C2 | C3 | C4 |
| --- | --- | --- | --- | --- |
| A1 | 0.000335 | 0.033933 | 0.031746 | 0.001043 |
| A2 | 1.47E-05 | 0.048072 | 0.019048 | 7.44E-05 |
| A3 | 1.47E-05 | 0.048072 | 0.031746 | 2.14E-05 |
| A4 | 1.47E-05 | 0.048072 | 0.019048 | 3.71E-05 |
| A5 | 3.24E-05 | 0.056555 | 0.031746 | 0.000468 |
| A6 | 0.00018 | 0.090488 | 0.034921 | 0.000353 |
| A7 | 2.58E-05 | 0.045244 | 0.034921 | 4.14E-05 |
| A8 | 2.21E-05 | 0.452441 | 0.012698 | 9.54E-05 |

**Table 19.** Feature weight Pij of the collected data, as shown in Table 9., C1 to C4 are concentration (mg.L-1), adsorbent dose (mg.L-1), pH, and maximum adsorption capacity qmax(mg.g-1), respectively, A1 to A8 are CS/Romanian CPL, CS/zeolite A cross-linked with ECH, CS/zeolite A cross-linked with ECH and TPP, CS/zeolite A without crosslinker, CS/Polyvinylpyrrolidone/ zeolite, CS-g-Poly(acrylic acid)/ attapulgite, CA/China zeolite, Nanoporous Cell/CS/Fe2O3, respectively.

|  | C1 | C2 | C3 | C4 |
| --- | --- | --- | --- | --- |
| ej | 0.002678 | 0.688290 | 0.369906 | 0.007778 |
| gj | 0.997322 | 0.311710 | 0.630094 | 0.992222 |
| wj | 0.340227 | 0.106337 | 0.214950 | 0.338487 |

**Table 20.** Output entropy ej, variation coefficient gj, and objective weight wj for each criterion.

To verify the weight calculation, the sum of all weights should be equal to 1:

|  | ( 6 ) |
| --- | --- |

**Figure 3.** Pie chart of the percentages of objective weights for all criteria of different composite biosorbents as alternatives for Cu(II) ions removal from aqueous media.

- - 1. **Entropy method applied to adsorption data of As(III) ions in aqueous media using different types of graphene**

All steps performed are detailed in Section 4 of the paper:

|  | | C1 | C2 | C3 | C4 |
| --- | --- | --- | --- | --- | --- |
| A1 | 0.023375 | 0.000676 | 0.035398 | 0.007336 |
| A2 | 0.002851 | 0.000664 | 0.283186 | 0.000786 |
| A3 | 0.002281 | 0.000675 | 0.141593 | 0.002876 |
| A4 | 0.002281 | 0.000675 | 0.141593 | 0.001635 |
| A5 | 0.002281 | 0.000675 | 0.141593 | 0.003423 |

**Table 21.** Feature weight Pij of the collected data, as shown in Table 10., C1 to C4 are concentration (mg.L-1), temperature (K), contact time (h), and adsorption capacity (mg.g-1), respectively, A1 to A5 are GO–ZrO(OH)2, Magnetite–RGO, RGO–Fe(0), RGO–Fe3O4, and RGO–Fe(0)/Fe3O4, respectively.

|  | | C1 | C2 | C3 | C4 |
| --- | --- | --- | --- | --- | --- |
| ej | 0.090792 | 0.015273 | 0.811406 | 0.054945 |
| gj | 0.909208 | 0.984727 | 0.188594 | 0.945055 |
| wj | 0.300308 | 0.325252 | 0.062292 | 0.312148 |

**Table 22.** Output entropy ej, variation coefficient gj, and objective weight wj for each criterion.

To verify the weight calculation, the sum of all weights should be equal to 1:

|  | ( 7 ) |
| --- | --- |

**Figure 4.** Pie chart of the percentages of objective weights for all criteria of graphene-based alternatives for As(III) ion removal from aqueous media.

- 1. **TOPSIS method applied to the adsorption data of heavy metals removal**
     1. **TOPSIS method applied to the absorption data of Pb(II) ions in aqueous media**

All steps performed are detailed in Section 4 of the paper:

|  | C1 | C2 | C3 | C4 | di+ | di- |
| --- | --- | --- | --- | --- | --- | --- |
| A1 | 0.035562 | 0.046091 | 0.074556 | 0.007237 | 0.094868 | 0.094868 |
| A2 | 0.135581 | 0.078355 | 0.119289 | 0.0749 | 0.210622 | 0.210622 |
| A3 | 0.135581 | 0.080659 | 0.119289 | 0.141364 | 0.243108 | 0.243108 |
| A4 | 0.135581 | 0.078355 | 0.119289 | 0.107146 | 0.224125 | 0.224125 |
| A5 | 0.017781 | 0.069137 | 0.00497 | 0.023184 | 0.075221 | 0.075221 |
| A6 | 0.135581 | 0.080659 | 0.119289 | 0.20059 | 0.281699 | 0.281699 |
| A7 | 0.003556 | 0.080659 | 0.00497 | 0.004021 | 0.080990 | 0.080990 |
|  | 0.135581 | 0.080659 | 0.00497 | 0.20059 |  |  |
|  | 0.003556 | 0.046091 | 0.119289 | 0.004021 |  |  |

**Table 23.** The weighted normalised decision matrix of the collected data in Table 8., maximum and minimum values of for the jth criterion, Euclidean norms of the ideal best di+ and the ideal worst di-, C1 to C4 are concentration (mg.L-1), pH, contact time (h), and adsorption capacity (mg.g-1), respectively, A1 to A7 are graphene heat treated at 973K, GO, GO, EDTA modified GO, SiO2/graphene, Poly(N-vinylcarbazole)–GO, and RGO–Fe(0)/Fe3O4, respectively.

| Si | Alternatives |
| --- | --- |
| 0.192490 | **A1** |
| 0.474264 | **A2** |
| 0.600614 | **A3** |
| 0.536035 | **A4** |
| 0.358216 | **A5** |
| 0.676718 | **A6** |
| 0.335271 | **A7** |

**Table 24.** The similarity to the worst condition or performance score Si for each alternative.

- - 1. **TOPSIS method applied to the adsorption data of Cu(II) ions in aqueous media**

All steps performed are detailed in Section 4 of the paper:

|  | C1 | C2 | C3 | C4 | di+ | di- |
| --- | --- | --- | --- | --- | --- | --- |
| A1 | 0.297334 | 0.024598 | 0.086747 | 0.294100 | 0.008675 | 0.408249 |
| A2 | 0.013084 | 0.034848 | 0.052048 | 0.020980 | 0.396710 | 0.034190 |
| A3 | 0.013084 | 0.034848 | 0.086747 | 0.006030 | 0.404923 | 0.046362 |
| A4 | 0.013084 | 0.034848 | 0.052048 | 0.010470 | 0.404018 | 0.031067 |
| A5 | 0.028785 | 0.040997 | 0.086747 | 0.132006 | 0.314225 | 0.133886 |
| A6 | 0.159625 | 0.065596 | 0.095422 | 0.099652 | 0.241774 | 0.179222 |
| A7 | 0.022897 | 0.032798 | 0.095422 | 0.011680 | 0.393883 | 0.055544 |
| A8 | 0.019626 | 0.327979 | 0.034699 | 0.026900 | 0.494211 | 0.263864 |
|  | 0.297334 | 0.024598 | 0.095422 | 0.294100 |  |  |
|  | 0.013084 | 0.065596 | 0.052048 | 0.006030 |  |  |

**Table 25.** The weighted normalised decision matrix of the collected data is presented in Table 9., maximum and minimum values of for the jth criterion, Euclidean norms of the ideal best di+ and the ideal worst di-, C1 to C4 are concentration (mg.L-1), adsorbent dose (mg.L-1), pH, and maximum adsorption capacity qmax(mg.g-1), respectively, A1 to A8 are CS/Romanian CPL, CS/zeolite A cross-linked with ECH, CS/zeolite A cross-linked with ECH and TPP, CS/zeolite A without crosslinker, CS/Polyvinylpyrrolidone/ zeolite, CS-g-Poly(acrylic acid)/ attapulgite, CA/China zeolite, Nanoporous Cell/CS/Fe2O3, respectively.

| Si | Alternatives |
| --- | --- |
| 0.979194 | **A1** |
| 0.079345 | **A2** |
| 0.102733 | **A3** |
| 0.071404 | **A4** |
| 0.298778 | **A5** |
| 0.425710 | **A6** |
| 0.123589 | **A7** |
| 0.348071 | **A8** |

**Table 26.** The similarity to the worst condition or performance score Si for each alternative.

- - 1. **TOPSIS method applied to the adsorption data of AS(III) ions in aqueous media**

All steps performed are detailed in Section 4 of the paper:

|  | C1 | C2 | C3 | C4 | di+ | di- |
| --- | --- | --- | --- | --- | --- | --- |
| A1 | 0.293993 | 0.146139 | 0.005860 | 0.260799 | 0.000000 | 0.355379 |
| A2 | 0.035853 | 0.143446 | 0.046879 | 0.027957 | 0.350059 | 0.007171 |
| A3 | 0.028682 | .145894 | 0.023440 | 0.102236 | 0.309581 | 0.077928 |
| A4 | 0.028682 | 0.145894 | 0.023440 | 0.058108 | 0.334339 | 0.038268 |
| A5 | 0.028682 | 0.145894 | 0.023440 | 0.121697 | 0.300080 | 0.096657 |
|  | 0.293993 | 0.146139 | 0.005860 | 0.260799 |  |  |
|  | 0.028682 | 0.143446 | 0.046879 | 0.027957 |  |  |

**Table 27.** Weighted normalized decision matrix of the collected data in Table 10., maximum and minimum value of for the jth criterion, Euclidean norms of the ideal best di+ and the ideal worst di-,C1 to C4 are concentration (mg.L-1), temperature (K), contact time (h), and adsorption capacity (mg.g-1), respectively, A1 to A5 are GO–ZrO(OH)2, Magnetite–RGO, RGO–Fe(0), RGO–Fe3O4, and RGO–Fe(0)/Fe3O4, respectively.

| Si | Alternatives |
| --- | --- |
| 1.000000 | **A1** |
| 0.020073 | **A2** |
| 0.201100 | **A3** |
| 0.102704 | **A4** |
| 0.243629 | **A5** |

**Table 28.** The similarity to the worst condition or performance score Si for each alternative.
